# Supplementary material for: Two-step ATP-driven opening of cohesin head
Source: PubMed Central journal article supplement (PMC5468275; doi:10.1038/s41598-017-03118-9), 2017-06-12
Supplement: 41598_2017_3118_MOESM1_ESM.pdf [file 41598_2017_3118_MOESM1_ESM.pdf]

## **Two-step ATP-driven opening of cohesin head**

Íñigo Marcos-Alcalde, Jesús I. Mendieta-Moreno, Beatriz Puisac, María Concepción Gil-Rodríguez, María Hernández-Marcos, Diego Soler-Polo, Feliciano J. Ramos, José Ortega, Juan Pié, Jesús Mendieta, Paulino Gómez-Puertas

### **Supplementary Information**

Containing Supplementary Figures 1-9 and Supplementary Videos 1-3.

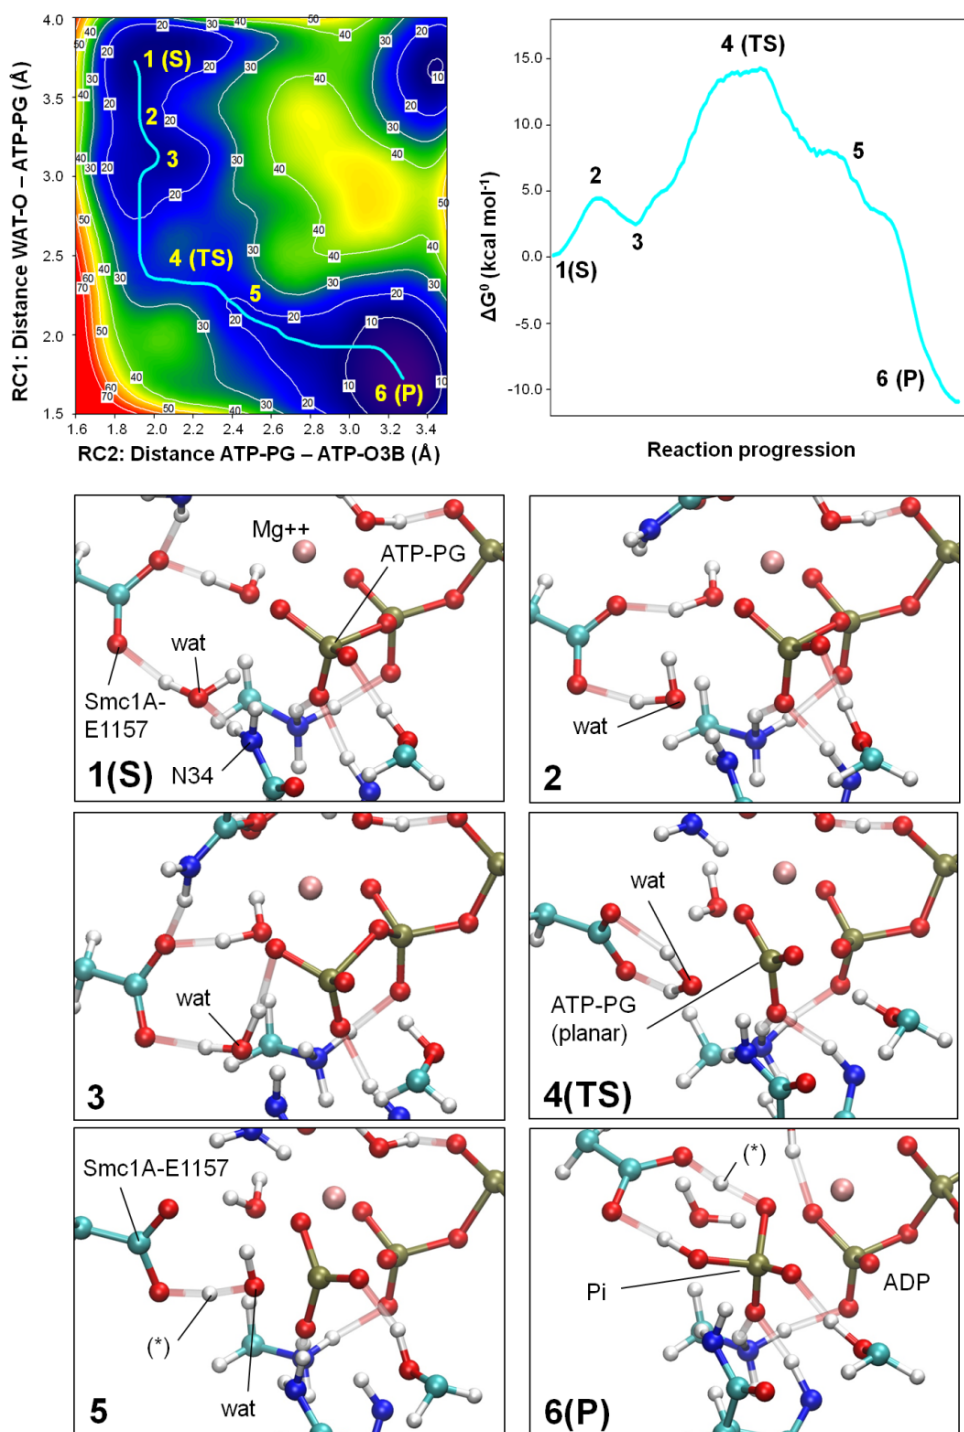

**Supplementary Figure 1 | Points of interest in the energy profile of the ATP hydrolysis at AS1 in the presence of Rad21-Cter.** Points of interest (1-6) of the MEPSA minimum energy path are indicated on the energy surface and the energy profile representation. A reference structure is shown for each. Frames 1 to 3 illustrate the initial water stabilization via hydrogen bonding with Smc1A-N34 (1), which is subsequently swapped for hydrogen bonding with the  $\gamma$ -phosphate (3), through an intermediate transition state (2). After the highest free-energy barrier associated with the planar configuration in the main transition state (4) is overcome, a small free-energy barrier associated with catalytic water deprotonation by Smc1A-E1157 can be observed (5). The product structure (6) is reached when the leaving inorganic phosphate group (Pi) is formed and when Smc1A-E1157 transfers the catalytic water proton to the leaving group. The proton (\*) initially transferred from the catalytic water to Smc1A-E1157 in (5) is labelled to illustrate the rotation of the Smc1A-E1157 residue prior to transfer of the proton to the inorganic phosphate (6).

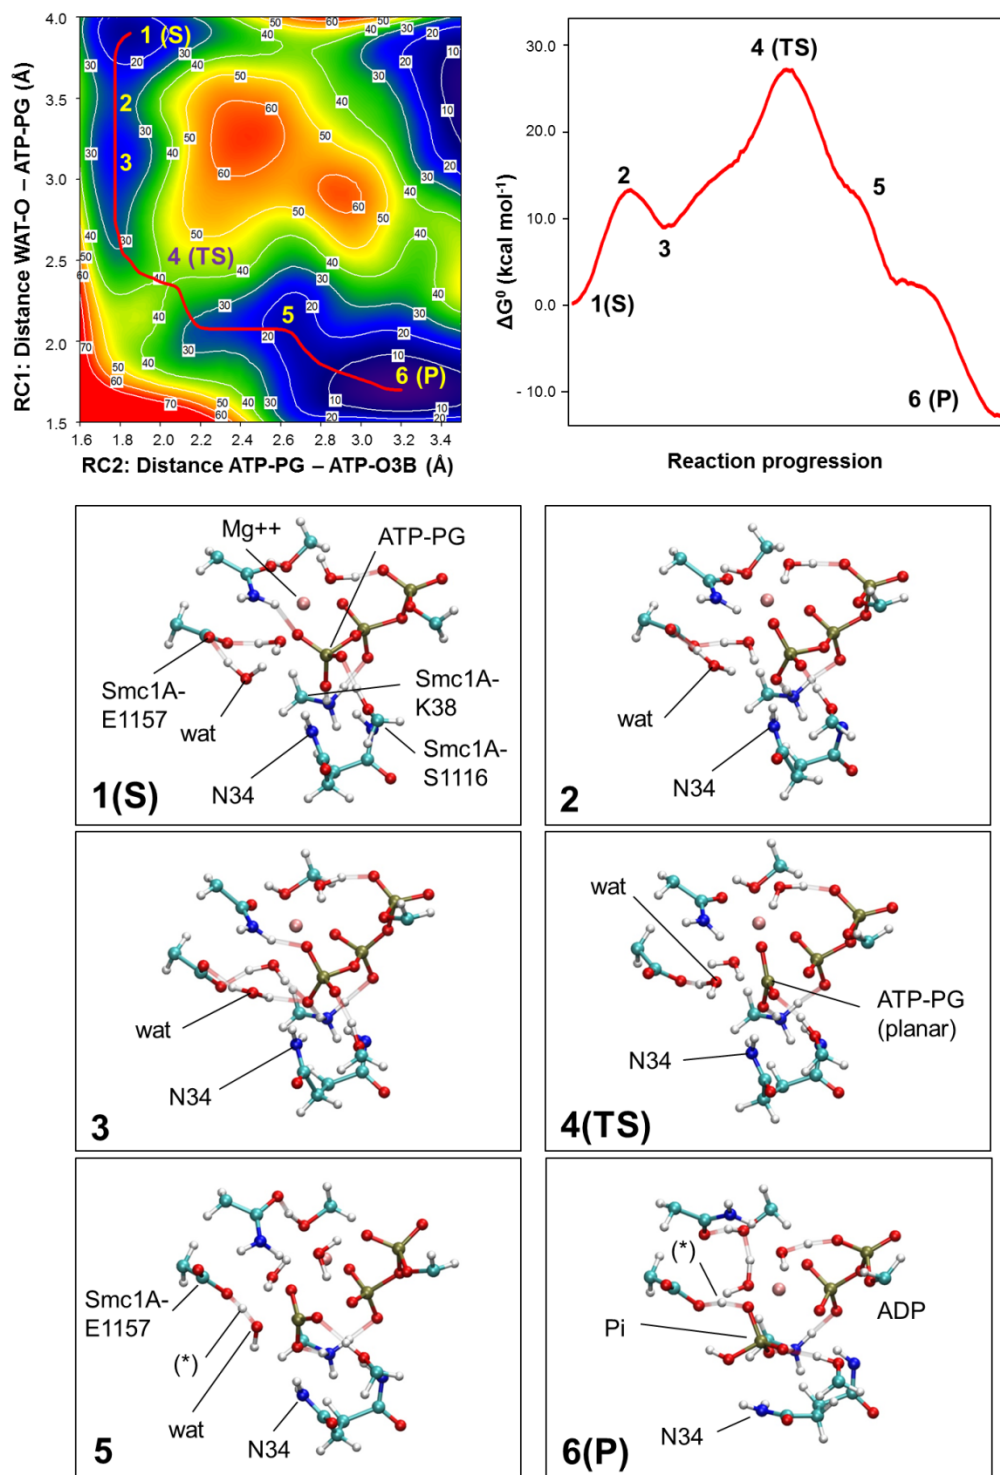

**Supplementary Figure 2 | Points of interest in the energy profile of the ATP hydrolysis at AS1 in the absence of Rad21-Cter.** Points of interest (1-6) of the MEPSA minimum energy path are indicated on the energy surface and the energy profile representation. A reference structure is shown for each. Frames 1 to 3 illustrate the initial water placement, from the initial location (1) to the stabilization via hydrogen bonding with the  $\gamma$ -phosphate (3), through the intermediate transition state (2). Note the location of Smc1A-N34, far from the water position. Structures from the main transition state (4), catalytic water deprotonation event (5) and product (6) are also displayed. The proton (\*) transferred from the catalytic water to Smc1A-E1157 in (5) is labelled.

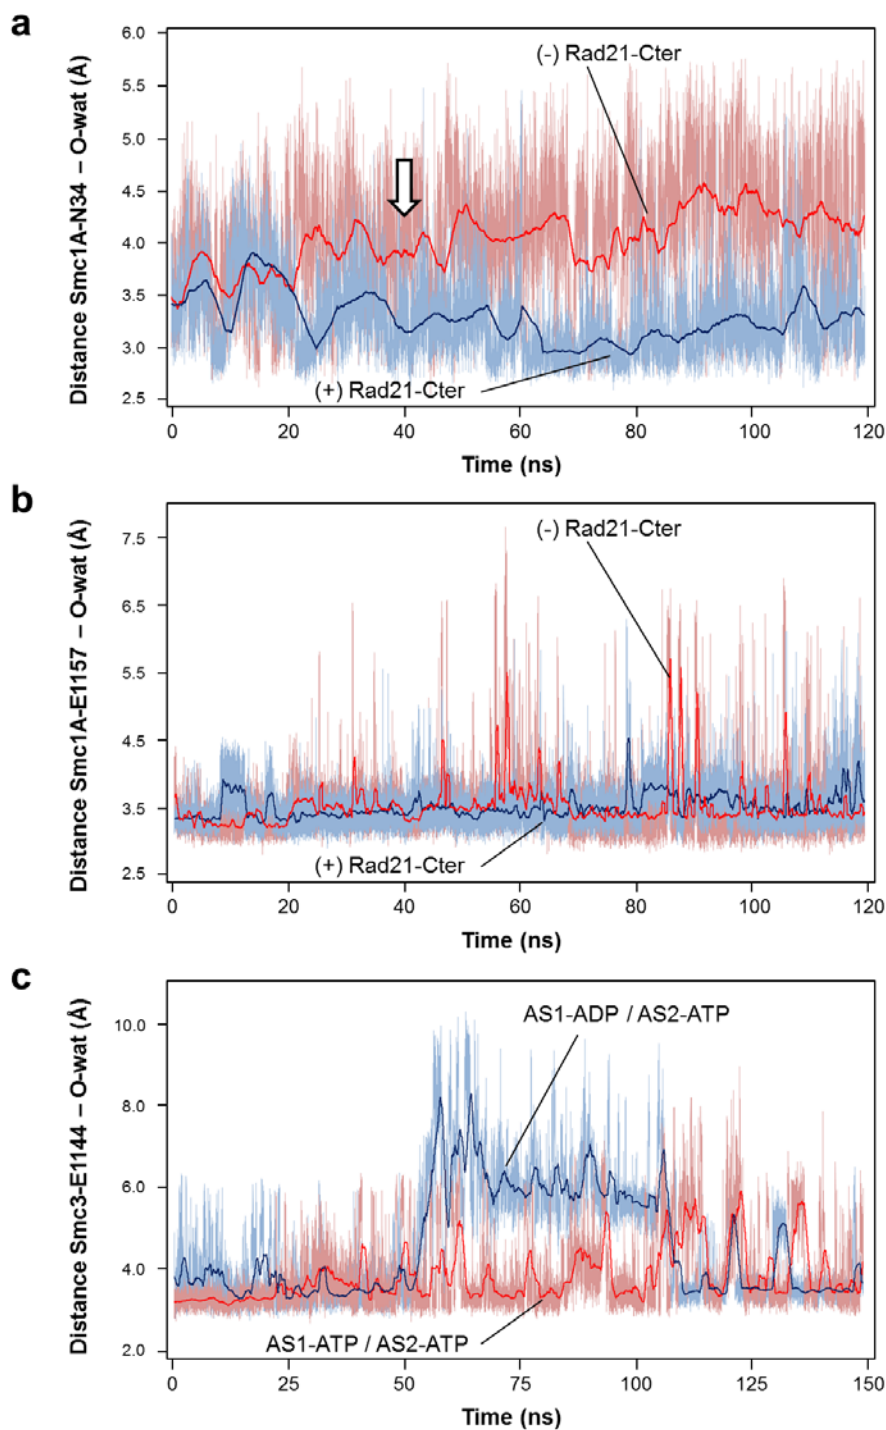

**Supplementary Figure 3 | Position of catalytic water molecules in the active centres.** (a) Evolution of the distance between the oxygen atom of the catalytic water in AS1 and the C $\gamma$  atom of the Smc1A-N34 residue (distance Smc1A-N34 - wat-O) in presence (cyan) and absence (red) of Rad21-Cter. The arrow indicates the position of the two snapshots selected as initial structure for QM/MM MD simulations. (b) Evolution of the distance between the oxygen atom of the catalytic water in AS1 and the C $\delta$  atom of the catalytic Smc1A-E1157 residue (distance Smc1A-E1157 - wat-O) in presence (cyan) and absence (red) of Rad21-Cter. (c) Evolution of the distance between the oxygen atom of the catalytic water in AS2 and the C $\delta$  atom of the catalytic Smc3-E1144 residue (distance Smc3-E114 - wat-O) prior (red) and after (cyan) ATP hydrolysis at AS1. The movement of the Smc3-E1144 residue, coordinated to the reallocation of Smc1A-K1120 in AS2, can be visualized in Supplementary video 2.

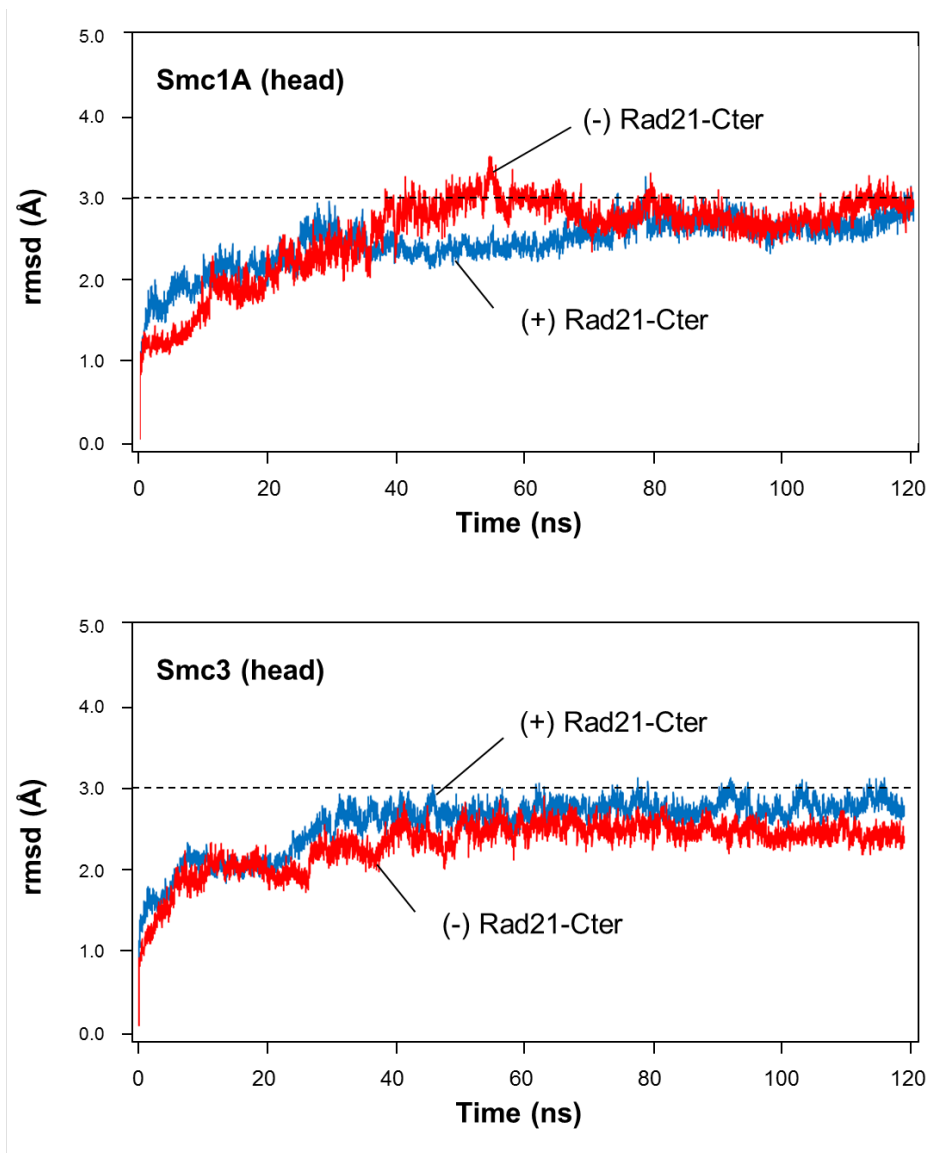

**Supplementary Figure 4 | Root mean square deviation (rmsd) values of Smc1A-head and Smc3-head domains.** rmsd values measured over the unrestricted 120 ns MD trajectory of the cohesin head complex in presence (cyan) and absence (red) of the Rad21-Cter domain.

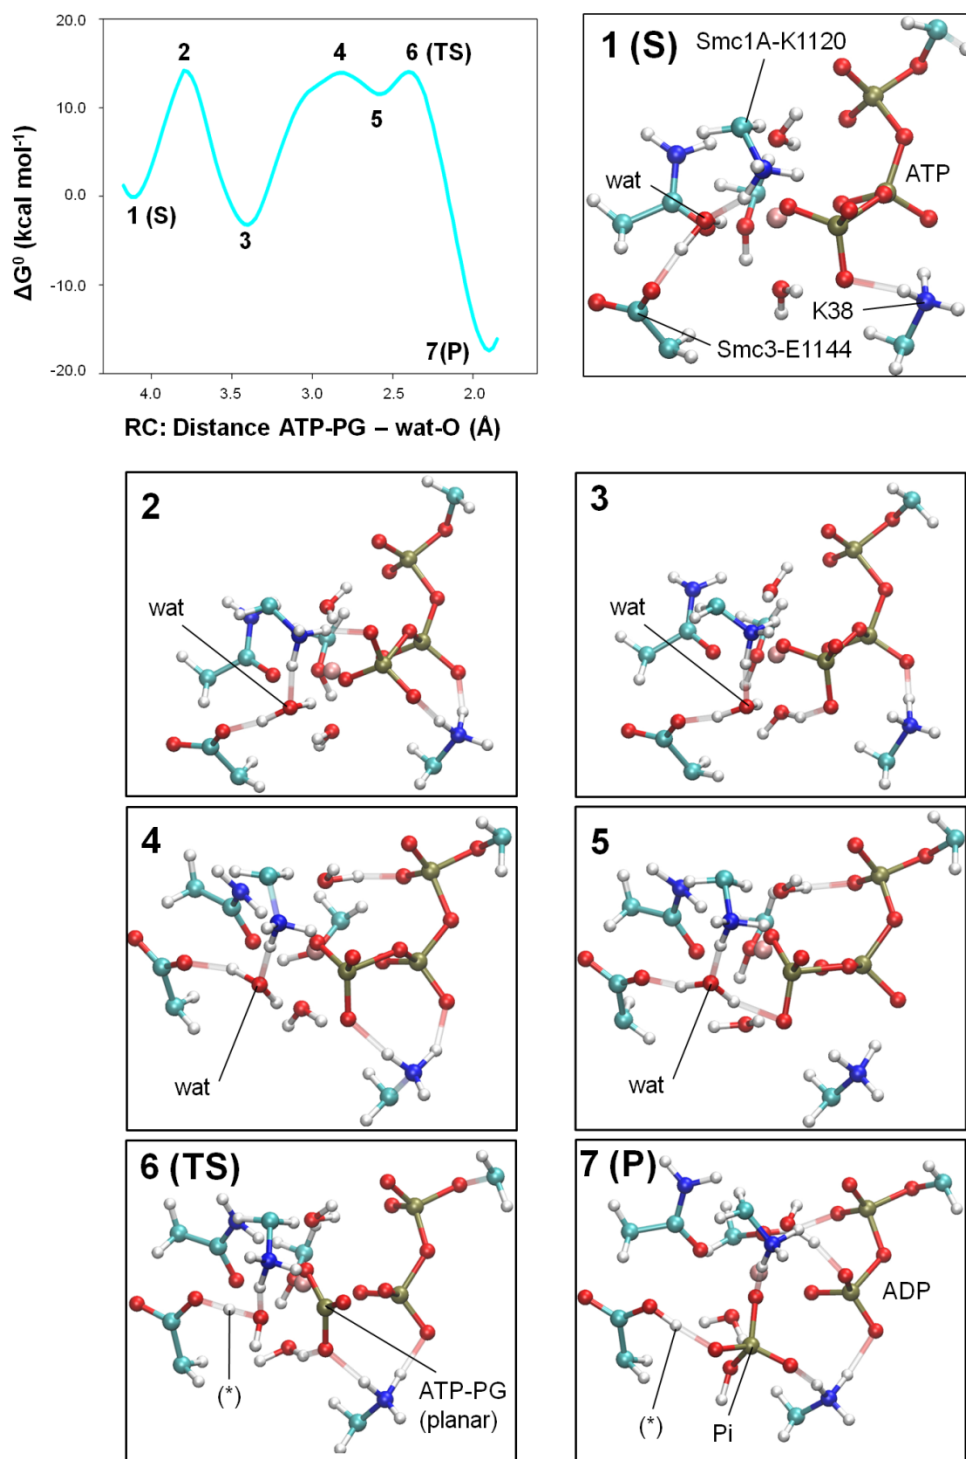

**Supplementary Figure 5 | Points of interest in the energy profile of the ATP hydrolysis at AS2 in its active form (AS1-ADP/AS2-ATP).** Points of interest (1-7) of the free-energy profile are indicated and a reference structure is shown for each one. The energy profile can be divided into 3 steps: the first (panels 1 to 3), is characterized by the entrance of the catalytic water molecule in the active site; the second (panels 3 to 5), corresponds to the stabilization of the catalytic water molecule prior to the transition state by triple hydrogen bonding with Smc3-E1144, Smc1A-K1120 and  $\gamma$ -phosphate; the final one (panels 6 and 7) correlates to the transition state, thus leading to the product structure. The leaving inorganic phosphate group is formed and Smc3-E1144 transfers the catalytic water proton (\*) to the leaving group.

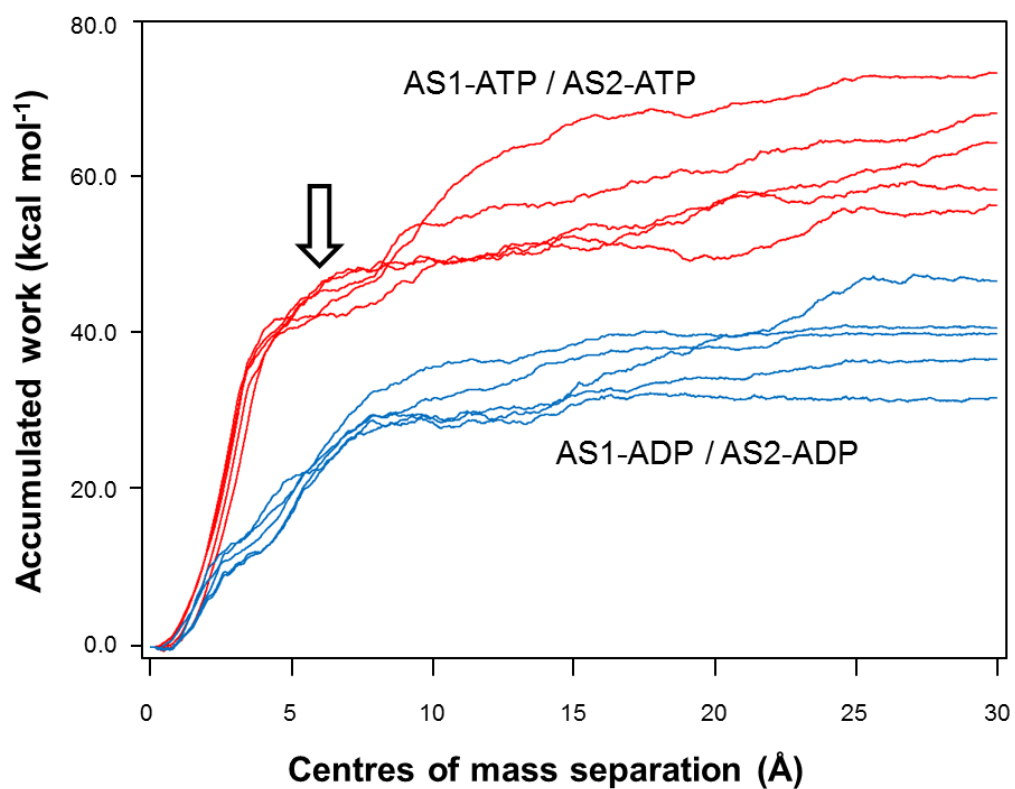

**Supplementary Figure 6 | Accumulated work (kcal mol<sup>-1</sup>) along the independent trajectories over the separation between the centres of mass of the Smc1A-head and Smc3-head domains.** Points from all five SMD trajectories for the AS1-ATP/AS2-ATP condition (red) and for AS1-ADP/AS2-ADP condition (cyan) are shown. The arrow indicates the distance in which the residues in both sides of the two active centres are completely detached.





|             |      |        |           |         |       |        |        |      |      |
|-------------|------|--------|-----------|---------|-------|--------|--------|------|------|
| SMC1A_HUMAN | 1109 | DGINYN | CVAPGKR-- | FRPMDN  | LSGG  | EKTVA  | AALALL | F    | 1143 |
| SMC1B_HUMAN | 1105 | EGISYN | CVAPGKR-- | FMPMDN  | LSGG  | EKCVA  | AALALL | F    | 1139 |
| SMC1A_MOUSE | 1109 | DGINYN | CVAPGKR-- | FRPMDN  | LSGG  | EKTVA  | AALALL | F    | 1143 |
| SMC1A_BOVIN | 1109 | DGINYN | CVAPGKR-- | FRPMDN  | LSGG  | EKTVA  | AALALL | F    | 1143 |
| SMC1A_XENLA | 1109 | DGINYN | CVAPGKR-- | FRPMDN  | LSGG  | EKTVA  | AALALL | F    | 1143 |
| SMC1_YEAST  | 1110 | AGIKYH | ATPPLKR-- | FKDMEY  | LSGG  | EKTVA  | AALALL | F    | 1144 |
| SMC3_HUMAN  | 1094 | TGVGIR | VSFTGK    | QGEMRE  | MQQL  | SGGQK  | SLVALA | LIFA | 1130 |
| SMC3_MOUSE  | 1094 | TGVGIR | VSFTGK    | QGEMRE  | MQQL  | SGGQK  | SLVALA | LIFA | 1130 |
| SMC3_BOVIN  | 1095 | TGVGIR | VSFTGK    | QGEMRE  | MQQL  | SGGQK  | SLVALA | LIFA | 1131 |
| SMC3_XENLA  | 1086 | TGVGIR | VSFTGK    | QAEMRE  | MQQL  | SGGQK  | SLVALA | LIFA | 1122 |
| SMC3_YEAST  | 1105 | TGVSIS | VSFNSK    | QNEQLH  | VEQL  | SGGQK  | TVCAIA | LILA | 1141 |
| SMC2_HUMAN  | 1066 | DGLEFK | VALGNTW-- | KENLTEL | SGGQR | SLVALS | LILS   | 1100 |      |
| SMC2_MOUSE  | 1066 | DGLEFK | VALGNTW-- | KENLTEL | SGGQR | SLVALS | LILS   | 1100 |      |
| SMC2_BOVIN  | 1066 | DGLEFK | VALGNTW-- | KENLTEL | SGGQR | SLVALS | LILS   | 1100 |      |
| SMC2_XENLA  | 1067 | DGLEFK | VALGNTW-- | KENLTEL | SGGQR | SLVALS | LILA   | 1101 |      |
| SMC2_YEAST  | 1065 | QGLEVK | VKLGNIW-- | KESLIEL | SGGQR | SLIALS | LIMA   | 1099 |      |
| SMC4_HUMAN  | 1172 | EGIMFS | VRPPKKS-- | WKKIFN  | LSGG  | EKTLSS | LALVFA | 1206 |      |
| SMC4_MOUSE  | 1170 | EGIMFS | VRPPKKS-- | WKKIFN  | LSGG  | EKTLSS | LALVFA | 1204 |      |
| SMC4_BOVIN  | 1172 | EGITFS | VRPPKKS-- | WKKIFN  | LSGG  | EKTLSS | LALVFA | 1206 |      |
| SMC4_XENLA  | 1166 | EGIMFS | VRPPKKS-- | WKKIFN  | LSGG  | EKTLSS | LALVFA | 1200 |      |
| SMC4_YEAST  | 1304 | EGVTFS | VMPKKS--  | WRNITN  | LSGG  | EKTLSS | LALVFA | 1338 |      |

**Supplementary Figure 7 | Multiple sequence alignment of several proteins homologous to human Smc1A in the area surrounding residue K1120.** The sequences represented are: human Smc1A (SMC1A\_HUMAN), Smc1B (SMC1B\_HUMAN), Smc3 (SMC3\_HUMAN), Smc2 (SMC2\_HUMAN) and Smc4 (SMC4\_HUMAN); *Mus musculus* Smc1A (SMC1A\_MOUSE), Smc3 (SMC3\_MOUSE), Smc2 (SMC2\_MOUSE) and Smc4 (SMC4\_MOUSE); *Bos taurus* Smc1A (SMC1A\_BOVIN), Smc3 (SMC3\_BOVIN), Smc2 (SMC2\_BOVIN) and Smc4 (SMC4\_BOVIN); *Xenopus laevis* Smc1A (SMC1A\_XENLA), Smc3 (SMC3\_XENLA), Smc2 (SMC2\_XENLA) and Smc4 (SMC4\_XENLA); and *Saccharomyces cerevisiae* Smc1 (SMC1\_YEAST), Smc3 (SMC3\_YEAST), Smc2 (SMC2\_YEAST) and Smc4 (SMC4\_YEAST). The residues are coloured according to conservation (BLOSUM62 score). The position of human Smc1A-K1120 is indicated by an arrow.





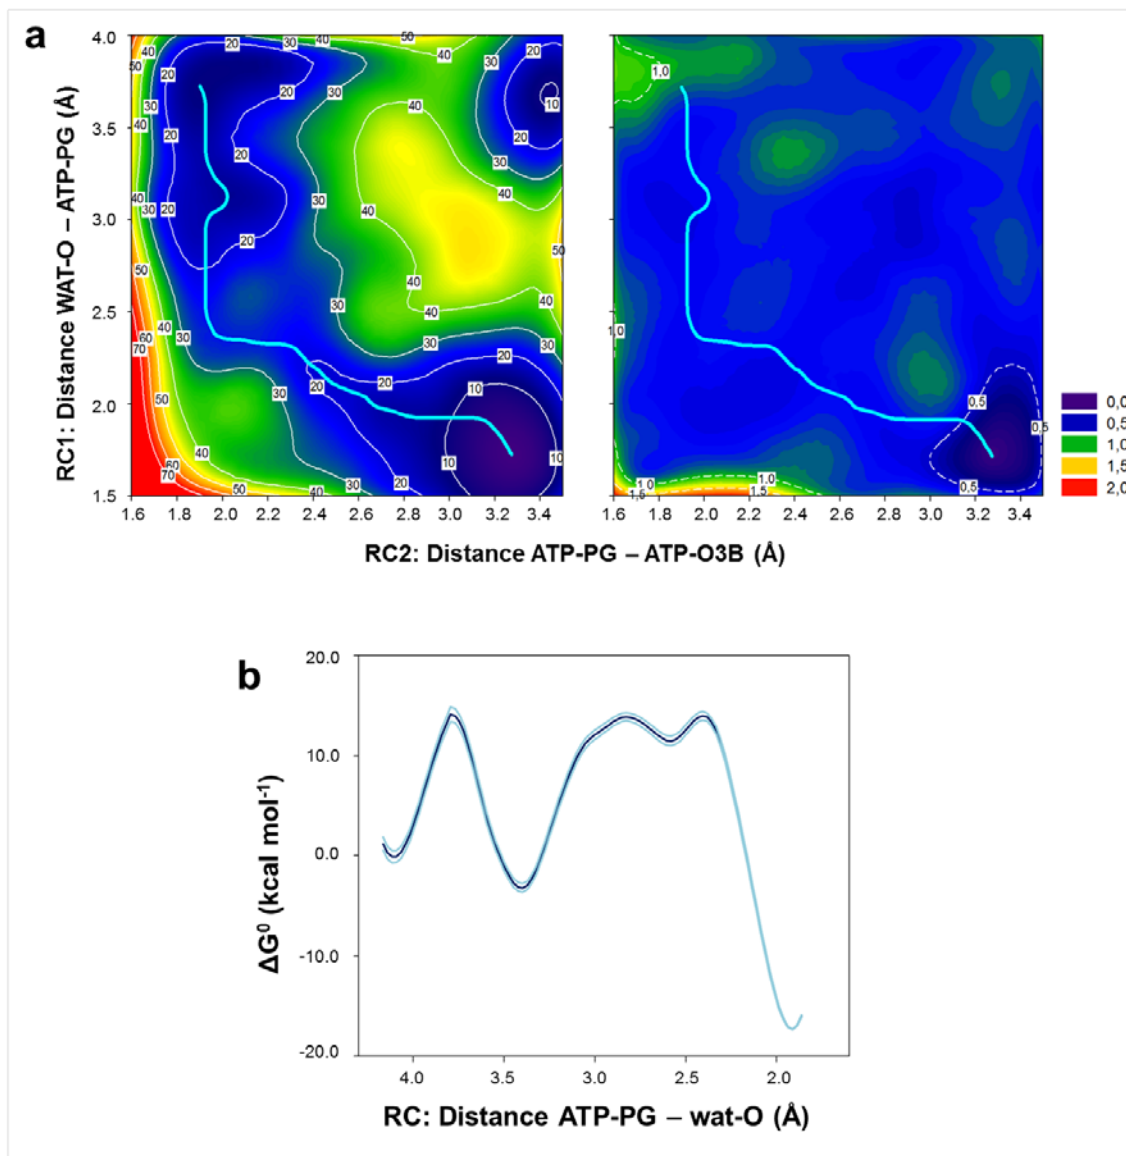

**Supplementary Figure 9 | Error analysis of free energy values.** (a) Standard deviation values (right) of the free-energy surface (left) for ATP hydrolysis at AS1 in the presence of Rad21-Cter. Error analysis was performed using bootstrap resampling (100 replicates) on the data. Color scale for standard deviation values is included. (b) Mean values  $\pm$  standard deviation of the 1D free-energy profile of ATP hydrolysis at AS2 in the AS1-ADP/AS2-ATP condition. Error analysis was performed using bootstrap resampling (100 replicates) on the data.

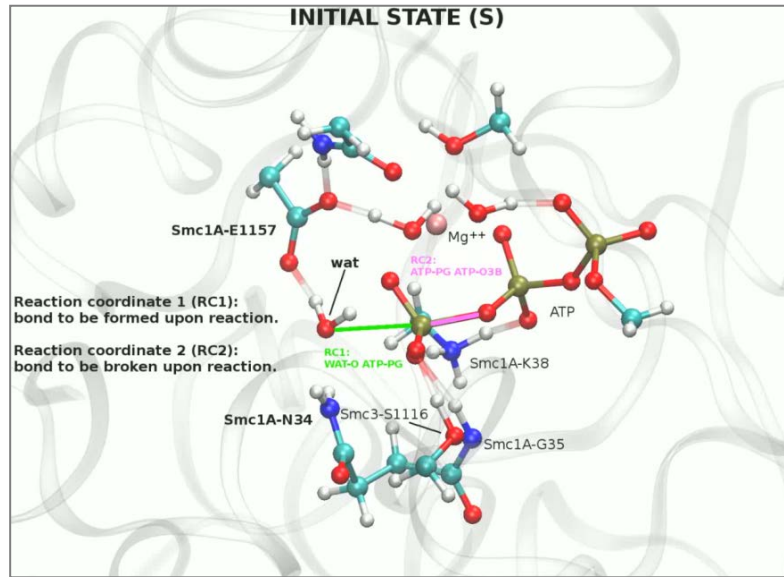

**Supplementary Video 1 | ATP hydrolysis at AS1 in the presence of Rad21.** The reaction along the MEPSA minimum energy path is shown in Supplementary Fig. 1. The different steps in the reaction are highlighted: initial structure (S), stabilization of the catalytic water molecule, transition state (TS) and final product (P).

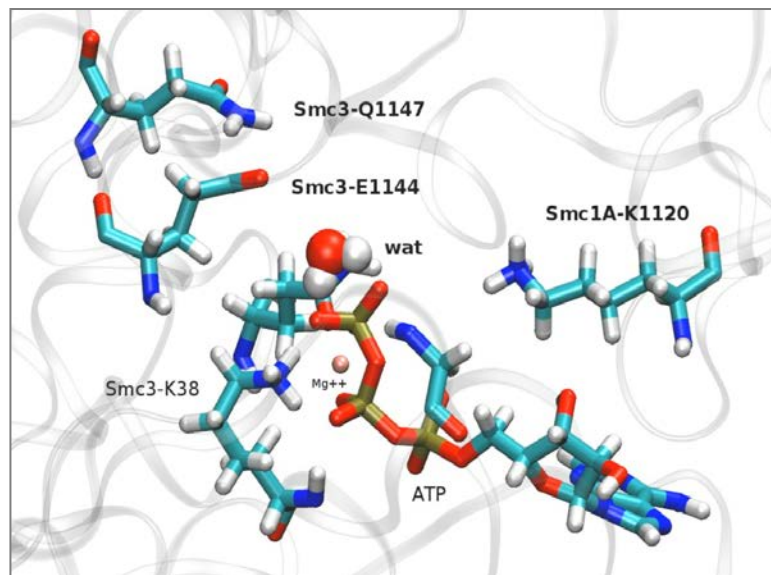

**Supplementary Video 2 | Positioning of Smc1A-K1120.** After ATP hydrolysis at AS1, Smc1A-K1120 moves close to the AS2 catalytic water molecule and remained in its new location in a stable conformation. The movie shows the MD from time 75 to 150 ns of Fig. 3a. Position of residue Smc3-Q1147 is also indicated. Protons are not shown during movement to avoid smoothing artifacts.

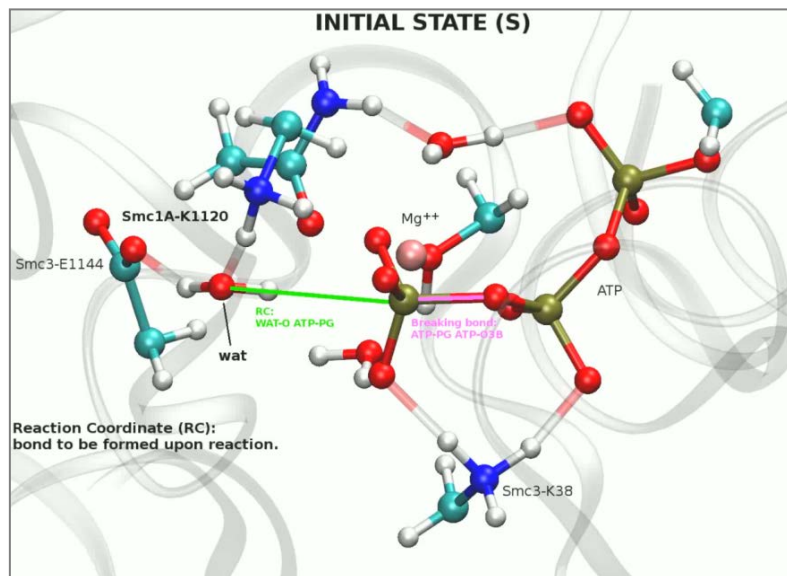

**Supplementary Video 3 | ATP hydrolysis at AS2 in its active form (AS1-ADP/AS2-ATP).** The reaction along the RC1 coordinate as indicated in Supplementary Fig. 5. Sequential steps in the reaction are highlighted: initial structure (S), transition state (TS) and final product (P).
